# Supplementary material for: Disparate Metabolomic Responses to Fructose Consumption between Different Mouse Strains and the Role of Gut Microbiota
Source: MDPI journal article supplement (doi:10.3390/metabo11060342), 2021-05-26
Supplement: s1 [file s1]

## Supplementary Data

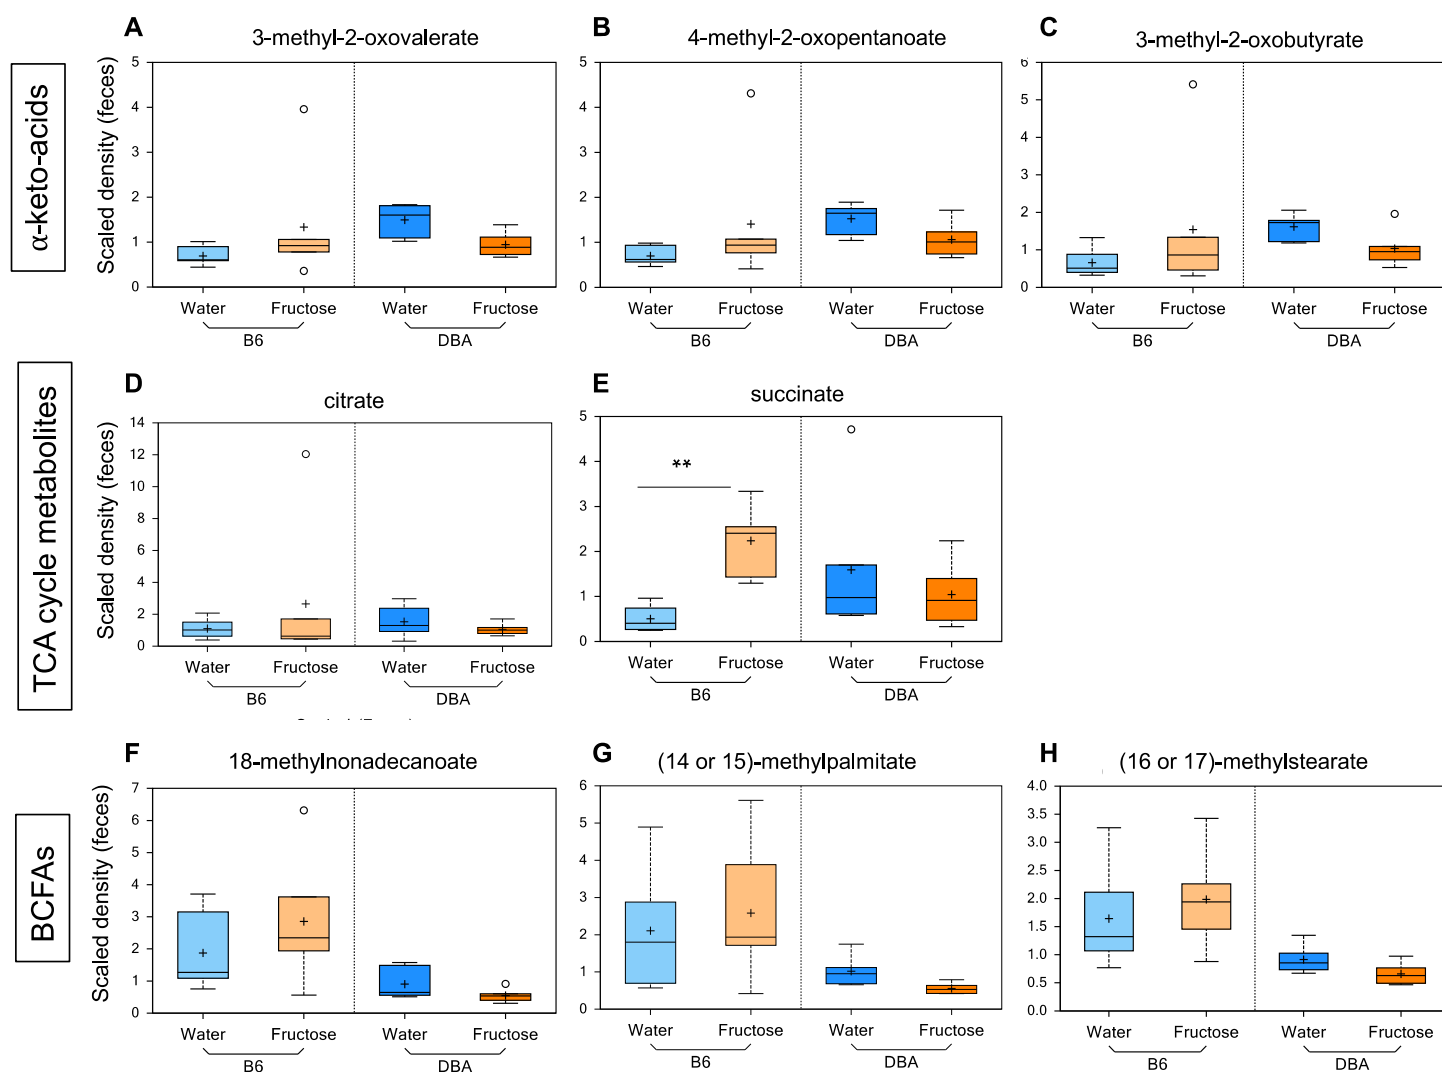

**Figure S1.** BCAA catabolism-related metabolites in feces of DBA and B6 mice.

n = 5-6/group. Statistical significance was determined by ANOVA contrast (\* $P < 0.05$ ).

## Supplementary Data

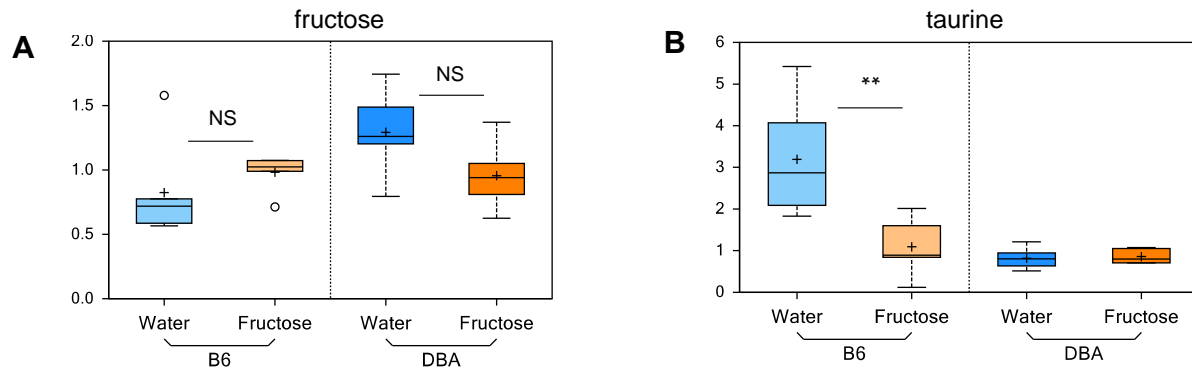

**Figure S2.** Box plots of fructose and taurine levels in feces of DBA and B6 mice.

n = 5-6/group. Statistical significance was determined by ANOVA contrast (\*\* $P < 0.01$ ).

NS indicates non-significant differences.
